# Supplementary material for: Clonally expanded CD8 T cells characterize Amyotrophic Lateral Sclerosis 4
Source: Research Square preprint supplement (doi:10.21203/rs.3.rs-798338/v1), 2021-08-14
Supplement: Supplementary file 1 [file 8f32024b34603b2f4947f2c9.xlsx]

## Sheet: Sheet1
Ctaa		CMV	Group and TCR size
CVVNSPGDNYQLIW_CASSQEGMAAGSYEQYF		CASSRLAGGTDTQYF	healthy 2, medium size; ALS4 2, single
CAASALNARLMF_CASRGTGYNEQFF		CASSLGGSPNYGYTF	ALS4 2, single
CAADSGGGADGLTF_CASSRDRDAYGYTF		RSSYNEQ	ALS4 1, single
